# Supplementary material for: Reversible-deactivation radical polymerization of vinyl acetate mediated by tralen, an organomediator
Source: Royal Society of Chemistry journal article supplement (doi:10.1039/d1py00904d), 2021-01-01
Supplement: d1py00904d1.pdf [file d1py00904d1.pdf]

## Supplementary Information for “Reversible-Deactivation Radical Polymerization of Vinyl Acetate Mediated by Tralen, An Organomediator”

Chun-Wei Chang<sup>†</sup>, Yu-Yu Jen<sup>†</sup>, Shan-Cheng Tang<sup>†</sup>, Pan Zhang<sup>‡</sup>, Changle Chen<sup>‡</sup>, and Chi-How Peng<sup>\*,†</sup>

[<sup>†</sup>] Department of Chemistry and Frontier Research Center on Fundamental and Applied Sciences of Matters, National Tsing Hua University, Hsinchu, 30013, Taiwan

[<sup>‡</sup>] CAS Key Laboratory of Soft Matter Chemistry, iChEM (Collaborative Innovation Center of Chemistry for Energy Materials), Department of Polymer Science and Engineering, University of Science and Technology of China, Hefei 230026, People's Republic of China

### Supporting information

|                                                                                       |    |
|---------------------------------------------------------------------------------------|----|
| <sup>1</sup> H NMR and <sup>13</sup> C NMR spectrum                                   | 2  |
| UV–Vis spectrum                                                                       | 3  |
| The metal content of tralen detected by ICP-MS.                                       | 3  |
| Experimental data of each polymerization                                              | 4  |
| Diffusion-ordered NMR spectroscopy (DOSY-NMR) of PVAc- <i>b</i> -PNVP block copolymer | 15 |
| Mass spectrum                                                                         | 15 |
| Model reaction for mechanism study                                                    | 16 |

$^1\text{H}$  NMR and  $^{13}\text{C}$  NMR spectrum

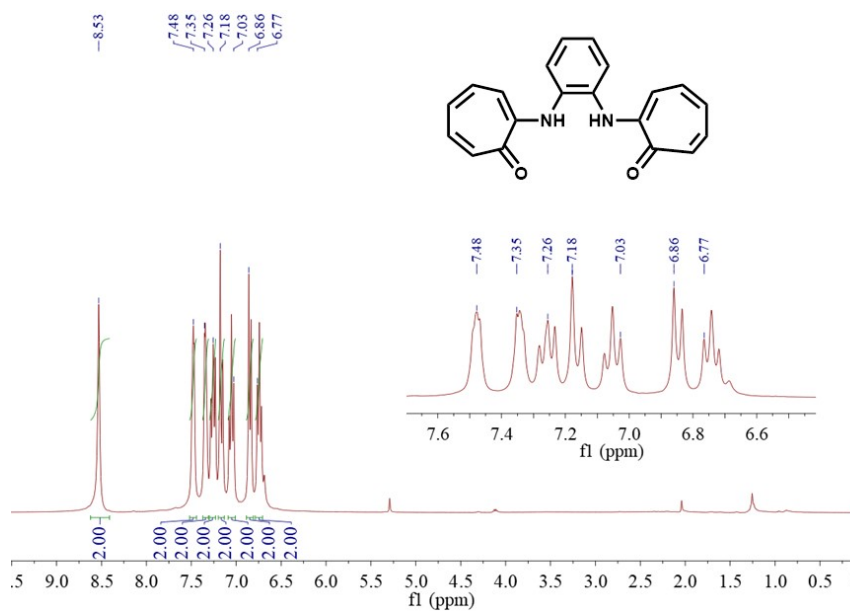

**Figure S1.**  $^1\text{H}$  NMR spectrum of 2,2'-(1,2-phenylenebis(azan-ediyl))bis(cyclohepta-2,4,6-trien-1-one) in CDCl<sub>3</sub>.

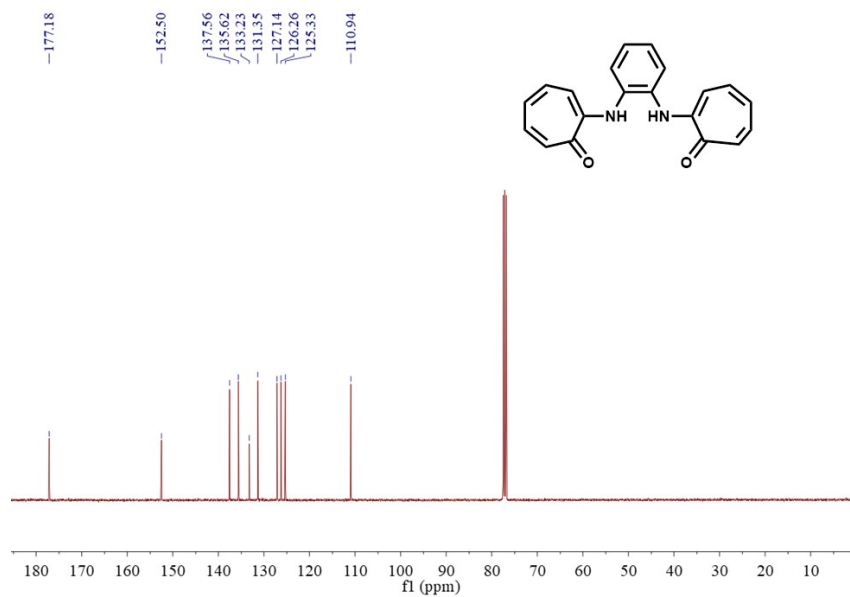

**Figure S2.**  $^{13}\text{C}$  NMR spectrum of 2,2'-(1,2-phenylenebis(azan-ediyl))bis(cyclohepta-2,4,6-trien-1-one) in CDCl<sub>3</sub>.

## UV-Vis spectrum

The absorption wavelengths of tralen shown the dual peaks at 345 and 387 nm, respectively. Moreover, it exhibited the broad shoulder peak around 400 to 450 nm.

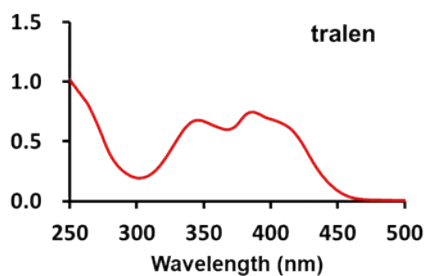

**Figure S3.** UV-Vis spectrum of tralen.

The metal content of tralen detected by ICP-MS

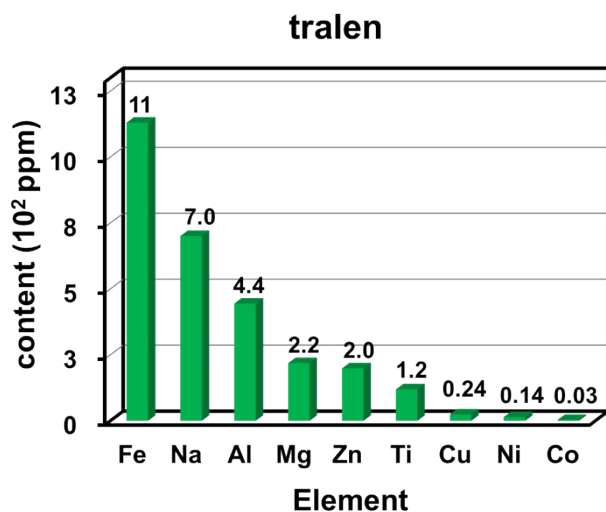

**Figure S4.** The content of metal in tralen organic compound.

The polymerization of VAc was performed with tralen (17.2 mg, 0.05 mmol) and AIBN (44.5 mg, 0.27 mmol) in the bulk solution of VAc (5 ml, 54 mmol). The reaction was heated to 60 °C to start the polymerization. Accordingly, we can calculate the molar concentration (M) of metal ions in the polymerization from the contents (ppm) of metal ions measured by ICP-MS:

$$\text{Fe} = 1100 \text{ (g)} / 10^6 \text{ g} \times 17.2 \times 10^{-3} \text{ (g)} / 55.845 \text{ (g mol}^{-1}\text{)} / 5 \times 10^{-3} \text{ (L)} = 6.78 \times 10^{-5} \text{ (M)}$$

$$\text{Na} = 700/10^6 \times 17.2 \times 10^{-3}/22.990/5 \times 10^{-3} = 1.05 \times 10^{-4} \text{ (M)}$$

$$\text{Al} = 440/10^6 \times 17.2 \times 10^{-3}/26.982/5 \times 10^{-3} = 5.61 \times 10^{-5} \text{ (M)}$$

$$\text{Mg} = 220/10^6 \times 17.2 \times 10^{-3}/24.305/5 \times 10^{-3} = 3.11 \times 10^{-5} \text{ (M)}$$

$$\text{Zn} = 200/10^6 \times 17.2 \times 10^{-3}/65.38/5 \times 10^{-3} = 1.05 \times 10^{-5} \text{ (M)}$$

$$\text{Ti} = 120/10^6 \times 17.2 \times 10^{-3}/47.867/5 \times 10^{-3} = 8.62 \times 10^{-6} \text{ (M)}$$

$$\text{Cu} = 24/10^6 \times 17.2 \times 10^{-3}/63.546/5 \times 10^{-3} = 1.30 \times 10^{-6} \text{ (M)}$$

$$\text{Ni} = 14/10^6 \times 17.2 \times 10^{-3}/58.693/5 \times 10^{-3} = 8.21 \times 10^{-7} \text{ (M)}$$

$$\text{Co} = 3/10^6 \times 17.2 \times 10^{-3}/58.933/5 \times 10^{-3} = 1.75 \times 10^{-7} \text{ (M)}$$

### Experimental data of each polymerization

**Table S1** Polymerization of VAc mediated by tralen compound with AIBN as initiator at 60 °C in bulk under the condition of  $[\text{tralen}]_0/[\text{AIBN}]_0/[\text{VAc}]_0 = 1/5/1000$

| Time (hours) | Conv. <sup>[a]</sup> (%) | $M_n^{[b]}$ (g mol <sup>-1</sup> ) | $M_{n,\text{th}}^{[c]}$ (g mol <sup>-1</sup> ) | $\bar{D}^{[b]}$ |
|--------------|--------------------------|------------------------------------|------------------------------------------------|-----------------|
| 24.0         | 0                        | -                                  | -                                              | -               |
| 29.0         | 0                        | -                                  | -                                              | -               |
| 34.0         | 1                        | 4100                               | 900                                            | 1.59            |
| 39.0         | 3                        | 4700                               | 2600                                           | 1.72            |
| 51.0         | 5                        | 6400                               | 4300                                           | 1.76            |
| 63.0         | 9                        | 10400                              | 7700                                           | 1.85            |
| 75.0         | 16                       | 19000                              | 13800                                          | 1.87            |
| 87.0         | 20                       | 22900                              | 17200                                          | 2.04            |
| 99.0         | 26                       | 30000                              | 23400                                          | 2.00            |
| 111.0        | 36                       | 35300                              | 31000                                          | 1.93            |
| 115.0        | 43                       | 36500                              | 37000                                          | 1.90            |

[a] Conversion was detected by <sup>1</sup>H NMR. [b]  $M_n$  and  $\bar{D}$  were determined by GPC with polystyrene as standard. [c]  $M_{n,\text{th}} = ([\text{VAc}]_0/[\text{tralen}]_0) \times (\text{M.W. of VAc}) \times \text{Conv.}$

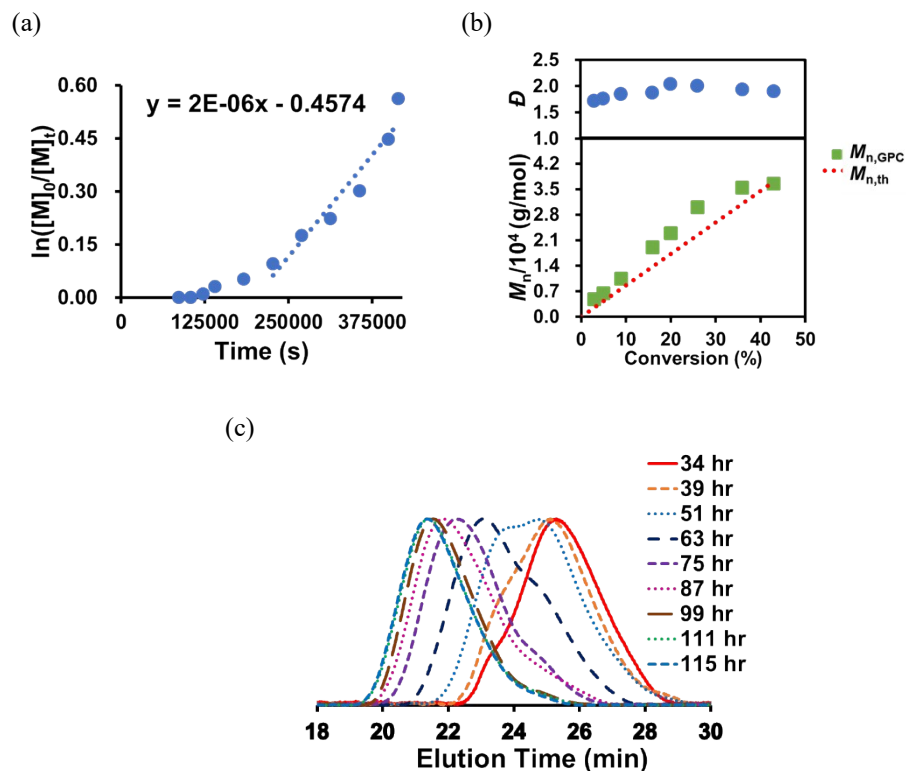

**Figure S5.** (a) First-order kinetics plots. (b) The plots of  $M_n$  and  $\bar{D}$  versus conversion. (c) The GPC traces for the polymerization of VAc mediated by tralen under the condition of  $[\text{tralen}]_0/[\text{AIBN}]_0/[\text{VAc}]_0 = 1/5/1000$ , at 60 °C in bulk.

**Table S2** Polymerization of VAc mediated by tralen compound with AIBN as initiator at 60 °C in bulk under the condition of  $[\text{tralen}]_0/[\text{AIBN}]_0/[\text{VAc}]_0 = 1/10/1000$

| Time (hours) | Conv. <sup>[a]</sup> (%) | $M_n^{[b]}$ (g mol <sup>-1</sup> ) | $M_{n,th}^{[c]}$ (g mol <sup>-1</sup> ) | $\bar{D}^{[b]}$ |
|--------------|--------------------------|------------------------------------|-----------------------------------------|-----------------|
| 13.0         | 1                        | 3700                               | 900                                     | 1.99            |
| 17.0         | 3                        | 5500                               | 2600                                    | 1.92            |
| 21.0         | 10                       | 10400                              | 8600                                    | 2.41            |
| 23.0         | 15                       | 15900                              | 12900                                   | 2.49            |
| 25.0         | 22                       | 23200                              | 18900                                   | 2.44            |
| 27.0         | 26                       | 30400                              | 22400                                   | 2.33            |
| 29.0         | 32                       | 39100                              | 27500                                   | 2.14            |
| 31.0         | 34                       | 43900                              | 29300                                   | 2.08            |
| 33.0         | 43                       | 50100                              | 37000                                   | 2.05            |

[a] Conversion was detected by <sup>1</sup>H NMR. [b]  $M_n$  and  $\bar{D}$  were determined by GPC with polystyrene as standard. [c]  $M_{n,th} = ([\text{VAc}]_0/[\text{tralen}]_0) \times (\text{M.W. of VAc}) \times \text{Conv.}$

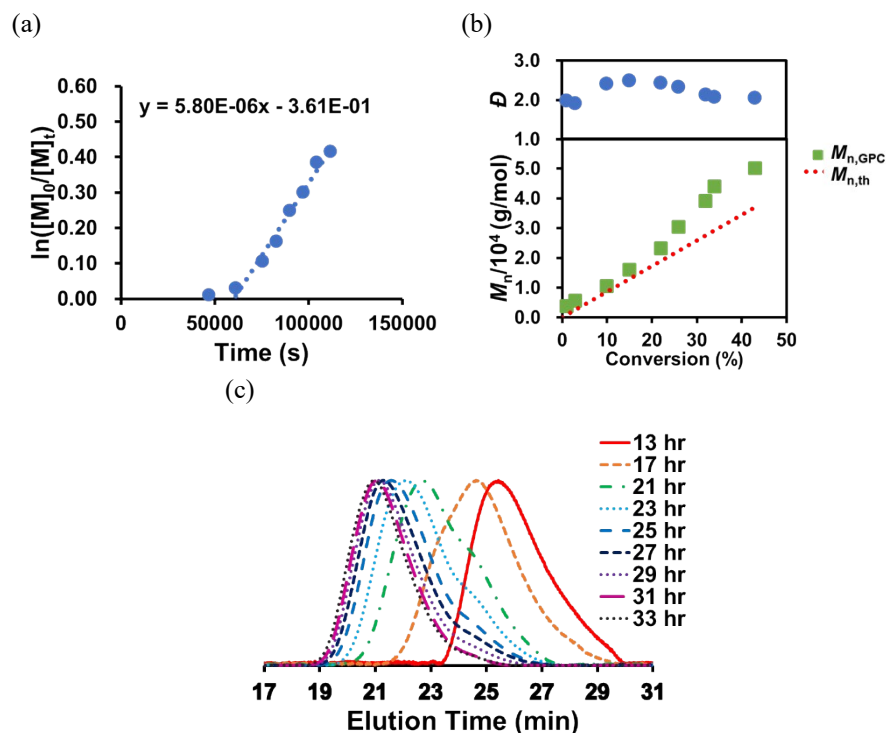

**Figure S6.** (a) First-order kinetics plots. (b) The plots of  $M_n$  and  $\bar{D}$  versus conversion. (c) The GPC traces for the polymerization of VAc mediated by tralen under the condition of  $[\text{tralen}]_0/[\text{AIBN}]_0/[\text{VAc}]_0 = 1/10/1000$ , at 60 °C in bulk.

**Table S3** Polymerization of VAc mediated by tralen compound with AIBN as initiator at 60 °C in bulk under the condition of  $[\text{tralen}]_0/[\text{AIBN}]_0/[\text{VAc}]_0 = 1/20/1000$

| Time (hours) | Conv. <sup>[a]</sup> (%) | $M_n^{[b]}$ (g mol <sup>-1</sup> ) | $M_{n,th}^{[c]}$ (g mol <sup>-1</sup> ) | $\bar{D}^{[b]}$ |
|--------------|--------------------------|------------------------------------|-----------------------------------------|-----------------|
| 3            | 0                        | -                                  | -                                       | -               |
| 4            | 2                        | 3200                               | 1700                                    | 1.58            |
| 5            | 4                        | 4300                               | 3400                                    | 1.69            |
| 6            | 6                        | 5500                               | 5200                                    | 1.99            |
| 7            | 12                       | 8600                               | 10300                                   | 2.28            |
| 8            | 19                       | 12900                              | 16300                                   | 2.72            |
| 9            | 29                       | 19400                              | 24900                                   | 2.65            |
| 10           | 40                       | 24700                              | 34400                                   | 2.60            |
| 11           | 43                       | 29300                              | 37000                                   | 2.53            |

<sup>[a]</sup> Conversion was detected by <sup>1</sup>H NMR. <sup>[b]</sup>  $M_n$  and  $\bar{D}$  were determined by GPC with polystyrene as standard. <sup>[c]</sup>  $M_{n,th} = ([\text{VAc}]_0/[\text{tralen}]_0) \times (\text{M.W. of VAc}) \times \text{Conv.}$

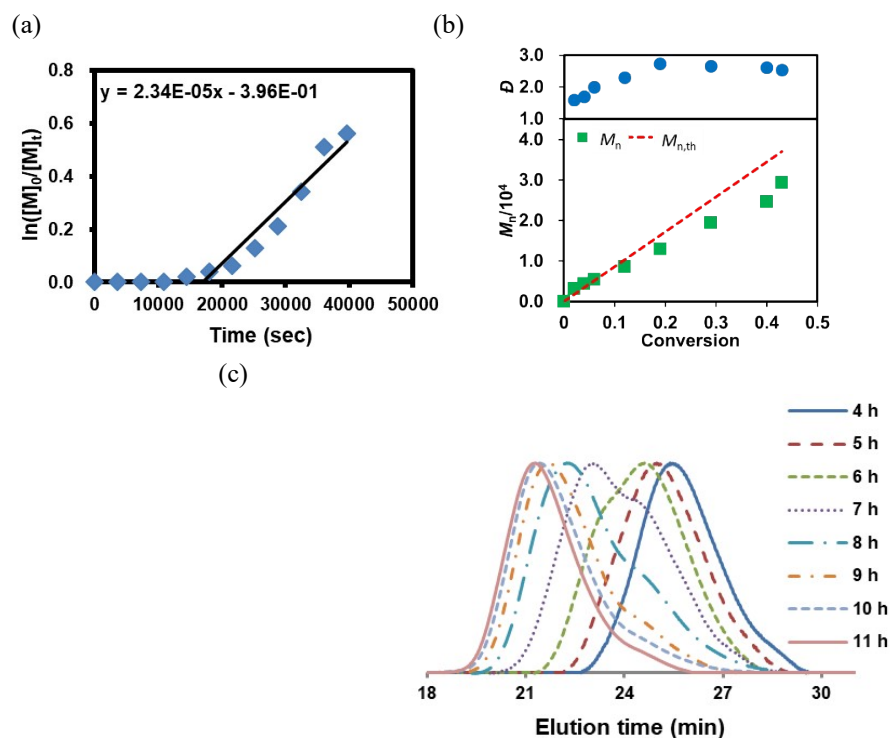

**Figure S7.** (a) First-order kinetics plots. (b) The plots of  $M_n$  and  $\bar{D}$  versus conversion. (c) The GPC traces for the polymerization of VAc mediated by tralen under the condition of  $[\text{tralen}]_0/[\text{AIBN}]_0/[\text{VAc}]_0 = 1/20/1000$ , at 60 °C in bulk.

**Table S4** Polymerization of VAc mediated by tralen compound with AIBN as initiator at 60 °C in bulk under the condition of  $[\text{tralen}]_0/[\text{AIBN}]_0/[\text{VAc}]_0 = 1/20/500$

| Time (hours) | Conv. <sup>[a]</sup> (%) | $M_n^{[b]}$ (g mol <sup>-1</sup> ) | $M_{n,th}^{[c]}$ (g mol <sup>-1</sup> ) | $\bar{D}^{[b]}$ |
|--------------|--------------------------|------------------------------------|-----------------------------------------|-----------------|
| 3.0          | 0                        | -                                  | -                                       | -               |
| 4.0          | 3                        | 2000                               | 1300                                    | 1.37            |
| 5.0          | 8                        | 2700                               | 3400                                    | 1.66            |
| 6.0          | 12                       | 4800                               | 5200                                    | 2.08            |
| 7.0          | 23                       | 6200                               | 9900                                    | 2.60            |
| 9.0          | 43                       | 14800                              | 18500                                   | 2.11            |
| 10.5         | 69                       | 27600                              | 29700                                   | 2.18            |

<sup>[a]</sup> Conversion was detected by <sup>1</sup>H NMR. <sup>[b]</sup>  $M_n$  and  $\bar{D}$  were determined by GPC with polystyrene as standard. <sup>[c]</sup>  $M_{n,th} = ([\text{VAc}]_0/[\text{tralen}]_0) \times (\text{M.W. of VAc}) \times \text{Conv.}$

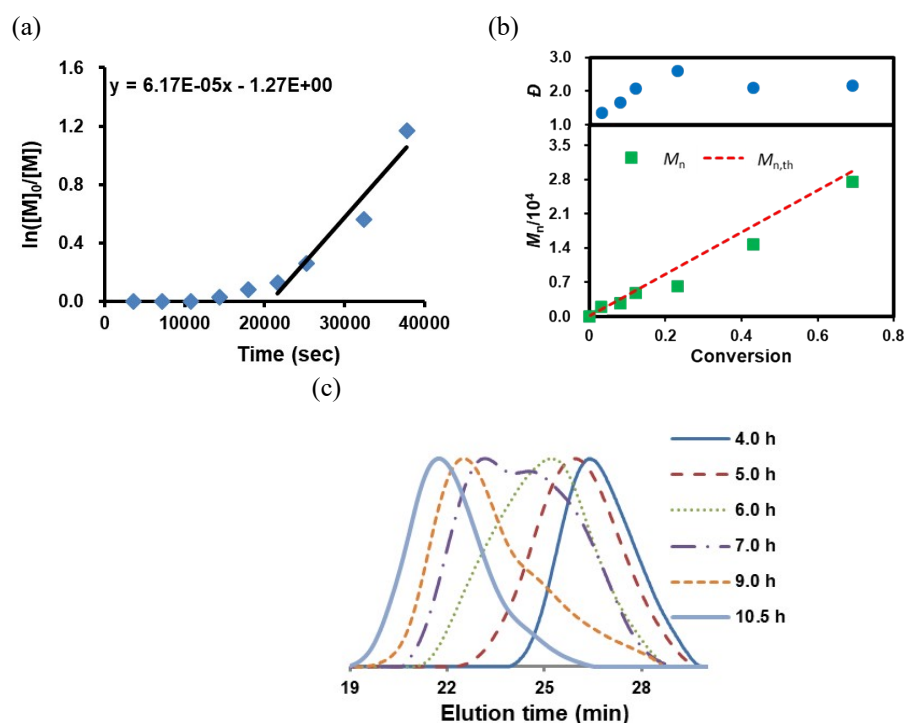

**Figure S8.** (a) First-order kinetics plots. (b) The plots of  $M_n$  and  $\bar{D}$  versus conversion. (c) The GPC traces for the polymerization of VAc mediated by tralen under the condition of  $[\text{tralen}]_0/[\text{AIBN}]_0/[\text{VAc}]_0 = 1/20/500$ , at 60 °C in bulk.

**Table S5** Polymerization of VAc mediated by tralen compound with AIBN as initiator at 60 °C in bulk under the condition of  $[\text{tralen}]_0/[\text{AIBN}]_0/[\text{VAc}]_0 = 1/20/4000$

| Time (hours) | Conv. <sup>[a]</sup> (%) | $M_n^{[b]}$ (g mol <sup>-1</sup> ) | $M_{n,th}^{[c]}$ (g mol <sup>-1</sup> ) | $\bar{D}^{[b]}$ |
|--------------|--------------------------|------------------------------------|-----------------------------------------|-----------------|
| 4.0          | 0                        | -                                  | -                                       | -               |
| 5.0          | 2                        | 9400                               | 6900                                    | 2.05            |
| 6.0          | 3                        | 13700                              | 10300                                   | 1.77            |
| 7.5          | 7                        | 18400                              | 24100                                   | 2.40            |
| 9.0          | 13                       | 37900                              | 44700                                   | 2.04            |
| 10.5         | 18                       | 48200                              | 61900                                   | 2.13            |
| 12.0         | 21                       | 62100                              | 72300                                   | 1.95            |
| 13.0         | 28                       | 82300                              | 96400                                   | 2.00            |

<sup>[a]</sup> Conversion was detected by <sup>1</sup>H NMR. <sup>[b]</sup>  $M_n$  and  $\bar{D}$  were determined by GPC with polystyrene as standard. <sup>[c]</sup>  $M_{n,th} = ([\text{VAc}]_0/[\text{tralen}]_0) \times (\text{M.W. of VAc}) \times \text{Conv.}$

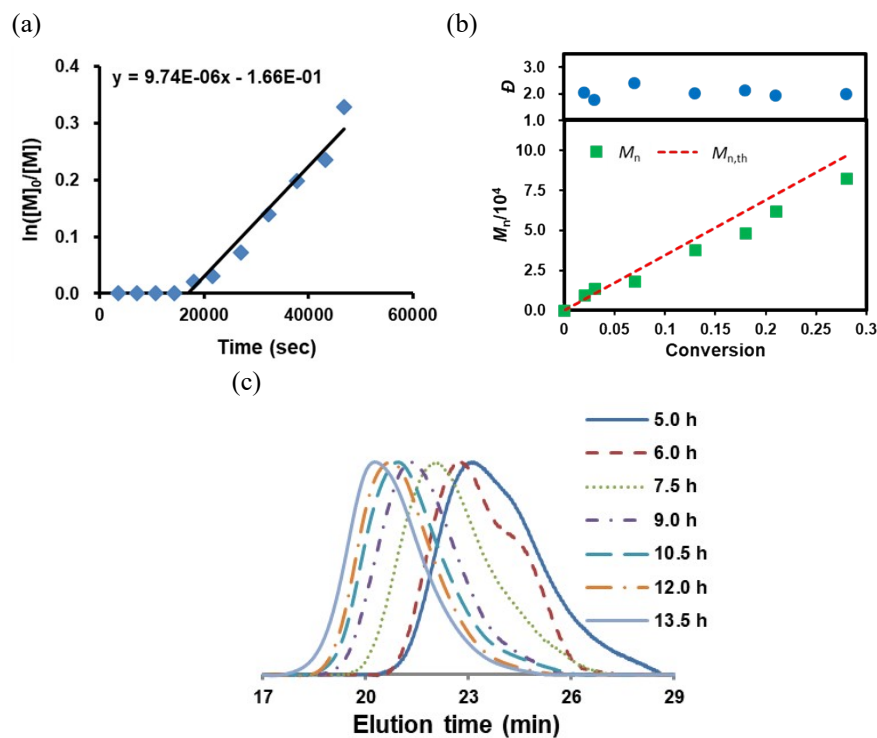

**Figure S9.** (a) First-order kinetics plots. (b) The plots of  $M_n$  and  $\bar{D}$  versus conversion. (c) The GPC traces for the polymerization of VAc mediated by tralen under the condition of  $[\text{tralen}]_0/[\text{AIBN}]_0/[\text{VAc}]_0 = 1/20/4000$ , at 60 °C in bulk.



**Table S6** Polymerization of VAc mediated by tralen compound with AIBN as initiator at 60 °C in bulk under the condition of  $[\text{tralen}]_0/[\text{AIBN}]_0/[\text{VAc}]_0 = 1/10/4000$

| Time (hours) | Conv. <sup>[a]</sup> (%) | $M_n^{[b]}$ (g mol <sup>-1</sup> ) | $M_{n,th}^{[c]}$ (g mol <sup>-1</sup> ) | $\bar{D}^{[b]}$ |
|--------------|--------------------------|------------------------------------|-----------------------------------------|-----------------|
| 12.0         | 0                        | -                                  | -                                       | -               |
| 16.0         | 2                        | 15000                              | 6900                                    | 1.67            |
| 20.0         | 4                        | 25700                              | 13800                                   | 1.78            |
| 24.0         | 10                       | 45900                              | 34400                                   | 1.95            |
| 26.0         | 13                       | 56700                              | 44800                                   | 2.04            |
| 28.0         | 19                       | 76300                              | 65400                                   | 2.08            |
| 30.0         | 24                       | 97500                              | 82600                                   | 2.06            |
| 32.0         | 30                       | 104300                             | 103300                                  | 2.38            |

[a] Conversion was detected by <sup>1</sup>H NMR. [b]  $M_n$  and  $\bar{D}$  were determined by GPC with polystyrene as standard. [c]  $M_{n,th} = ([\text{VAc}]_0/[\text{tralen}]_0) \times (\text{M.W. of VAc}) \times \text{Conv.}$

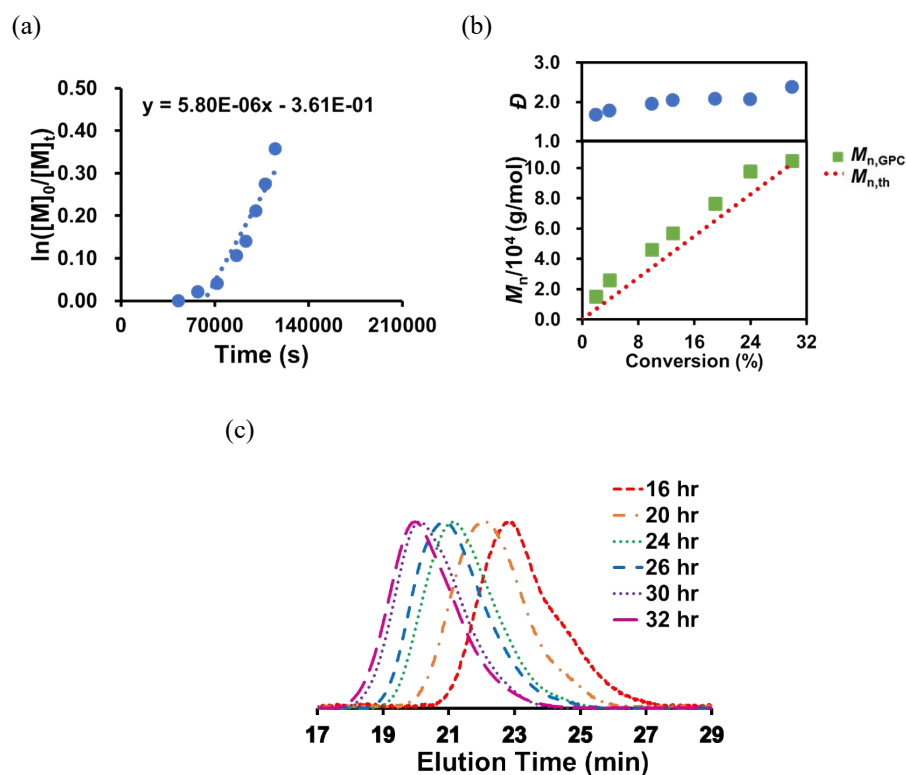

**Figure S10.** (a) First-order kinetics plots. (b) The plots of  $M_n$  and  $\bar{D}$  versus conversion. (c) The GPC traces for the polymerization of VAc mediated by tralen under the condition of  $[\text{tralen}]_0/[\text{AIBN}]_0/[\text{VAc}]_0 = 1/10/4000$ , at 60 °C in bulk.

**Table S7** Polymerization of MA mediated by tralen compound with AIBN as initiator at 60 °C in chloroform under the condition of  $[\text{tralen}]_0/[\text{AIBN}]_0/[\text{MA}]_0 = 1/10/1000$ ,  $[\text{MA}]_0 = 3.68 \text{ M}$

| Time (hours) | Conv. <sup>[a]</sup> (%) | $M_n^{[b]}$ (g mol <sup>-1</sup> ) | $M_{n,\text{th}}^{[c]}$ (g mol <sup>-1</sup> ) | $\bar{D}^{[b]}$ |
|--------------|--------------------------|------------------------------------|------------------------------------------------|-----------------|
| 1.0          | 6                        | 20500                              | 5100                                           | 2.05            |
| 2.0          | 14                       | 21600                              | 12100                                          | 2.00            |
| 3.0          | 22                       | 24200                              | 18900                                          | 2.05            |
| 4.0          | 30                       | 24300                              | 25800                                          | 2.07            |
| 5.0          | 36                       | 24000                              | 31000                                          | 2.11            |
| 6.0          | 40                       | 25200                              | 34400                                          | 2.03            |
| 7.5          | 48                       | 26700                              | 41400                                          | 2.00            |
| 9.0          | 53                       | 29500                              | 45700                                          | 1.92            |
| 10.5         | 62                       | 32200                              | 53400                                          | 1.83            |
| 12.0         | 69                       | 34100                              | 59400                                          | 1.81            |
| 14.0         | 76                       | 35500                              | 65400                                          | 1.81            |

<sup>[a]</sup> Conversion was detected by <sup>1</sup>H NMR. <sup>[b]</sup>  $M_n$  and  $\bar{D}$  were determined by GPC with polystyrene as standard. <sup>[c]</sup>  $M_{n,\text{th}} = ([\text{MA}]_0/[\text{tralen}]_0) \times (\text{M.W. of MA}) \times \text{Conv.}$

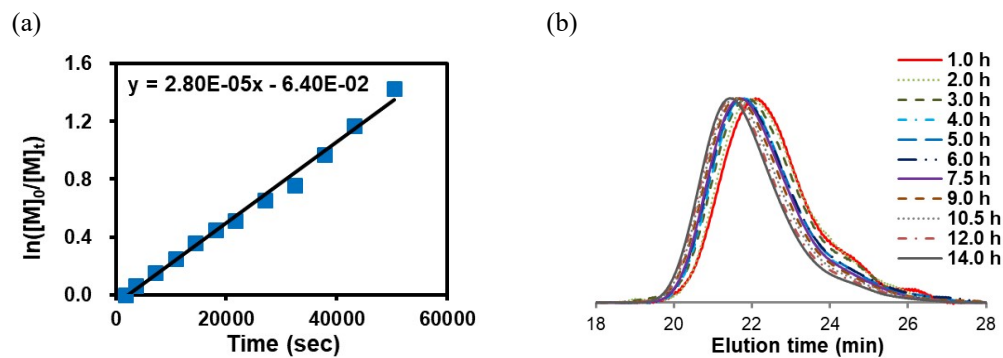

**Figure S11.** (a) First-order kinetics plots. (b) The GPC traces for the polymerization of MA mediated by tralen under the condition of  $[\text{tralen}]_0/[\text{AIBN}]_0/[\text{MA}]_0 = 1/10/1000$ ,  $[\text{MA}]_0 = 3.68 \text{ M}$  at 60 °C in chloroform.

**Table S8** Polymerization of MMA mediated by tralen compound with AIBN as initiator at 60 °C in chloroform under the condition of  $[\text{tralen}]_0/[\text{AIBN}]_0/[\text{MMA}]_0 = 1/10/1000$ ,  $[\text{MMA}]_0 = 3.13 \text{ M}$ .

| Time (hours) | Conv. <sup>[a]</sup> (%) | $M_n^{[b]}$ (g mol <sup>-1</sup> ) | $M_{n,\text{th}}^{[c]}$ (g mol <sup>-1</sup> ) | $\bar{D}^{[b]}$ |
|--------------|--------------------------|------------------------------------|------------------------------------------------|-----------------|
| 0.5          | 8                        | 68700                              | 8000                                           | 1.64            |
| 1.0          | 19                       | 57900                              | 19000                                          | 1.80            |
| 2.0          | 42                       | 54300                              | 42100                                          | 1.67            |
| 3.0          | 52                       | 53100                              | 52100                                          | 1.68            |
| 4.0          | 64                       | 43200                              | 64100                                          | 1.88            |
| 5.0          | 73                       | 38100                              | 73100                                          | 2.00            |
| 6.5          | 80                       | 38200                              | 80100                                          | 1.95            |

<sup>[a]</sup> Conversion was detected by <sup>1</sup>H NMR. <sup>[b]</sup>  $M_n$  and  $\bar{D}$  were determined by gel permeation chromatography (GPC) with polystyrene as standard. <sup>[c]</sup>  $M_{n,\text{th}} = ([\text{MMA}]_0/[\text{tralen}]_0) \times (\text{M.W. of MMA}) \times \text{Conv.}$

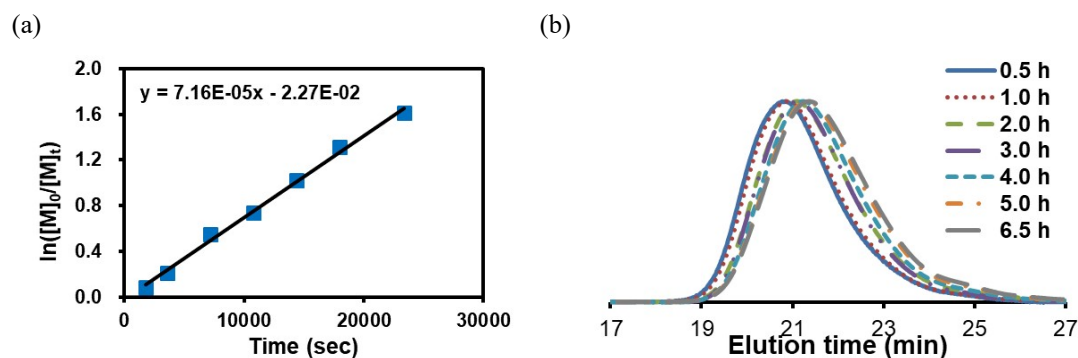

**Figure S12.** (a) First-order kinetics plots (b) The GPC traces for the polymerization of MMA mediated by tralen under the condition of  $[\text{tralen}]_0/[\text{AIBN}]_0/[\text{MMA}]_0 = 1/10/1000$ ,  $[\text{MMA}]_0 = 3.13 \text{ M}$  at 60 °C in chloroform.

**Table S9** Polymerization of Sty mediated by tralen compound with AIBN as initiator at 90 °C in acetonitrile under the condition of  $[\text{tralen}]_0/[\text{AIBN}]_0/[\text{Sty}]_0 = 1/10/1000$ ,  $[\text{Sty}]_0 = 2.90 \text{ M}$

| Time (hours) | Conv. <sup>[a]</sup> (%) | $M_n^{[b]}$ (g mol <sup>-1</sup> ) | $M_{n,\text{th}}^{[c]}$ (g mol <sup>-1</sup> ) | $\bar{D}^{[b]}$ |
|--------------|--------------------------|------------------------------------|------------------------------------------------|-----------------|
| 0.5          | 7                        | 8500                               | 7300                                           | 1.69            |
| 1.5          | 22                       | 8800                               | 22900                                          | 1.82            |
| 3.0          | 35                       | 9600                               | 36500                                          | 1.90            |
| 5.5          | 57                       | 7900                               | 59400                                          | 2.11            |
| 7.0          | 63                       | 8300                               | 65600                                          | 2.18            |

<sup>[a]</sup> Conversion was detected by <sup>1</sup>H NMR. <sup>[b]</sup>  $M_n$  and  $\bar{D}$  were determined by GPC with polystyrene as standard. <sup>[c]</sup>  $M_{n,\text{th}} = ([\text{Sty}]_0/[\text{tralen}]_0) \times (\text{M.W. of Sty}) \times \text{Conv.}$

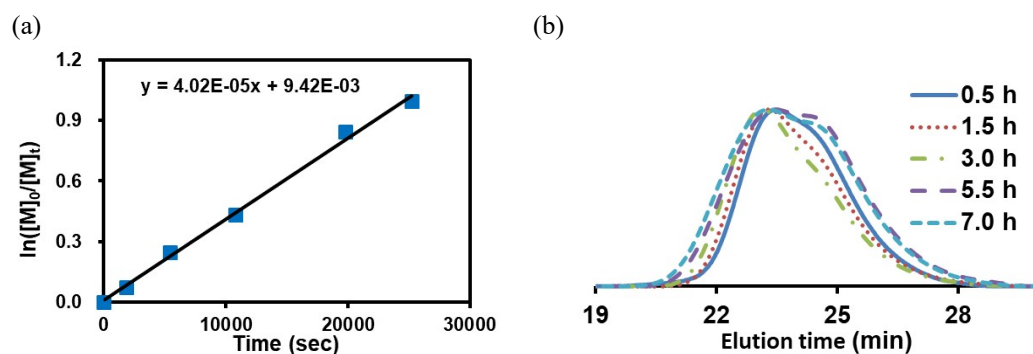

**Figure S13.** (a) First-order kinetics plots. (b) The GPC traces for the polymerization of Sty mediated by tralen under the condition of  $[\text{tralen}]_0/[\text{AIBN}]_0/[\text{Sty}]_0 = 1/10/1000$ ,  $[\text{Sty}]_0 = 2.90 \text{ M}$  at 90 °C in acetonitrile.

**Table S10** Polymerization of AN mediated by tralen compound with AIBN as initiator at 60 °C in DMF under the condition of  $[\text{tralen}]_0/[\text{AIBN}]_0/[\text{AN}]_0 = 1/10/1000$ ,  $[\text{AN}]_0 = 5.08 \text{ M}$

| Time (hours) | Conv. <sup>[a]</sup> (%) | $M_n^{[b]}$ (g mol <sup>-1</sup> ) | $M_{n,\text{th}}^{[c]}$ (g mol <sup>-1</sup> ) | $\bar{D}^{[b]}$ |
|--------------|--------------------------|------------------------------------|------------------------------------------------|-----------------|
| 2            | 7                        | 7200                               | 3700                                           | 1.77            |
| 3            | 12                       | 9600                               | 6400                                           | 1.65            |
| 5            | 18                       | 11600                              | 9600                                           | 1.53            |
| 7            | 24                       | 12100                              | 12700                                          | 1.56            |
| 9            | 27                       | 12300                              | 14300                                          | 1.58            |
| 11           | 31                       | 13000                              | 16500                                          | 1.53            |
| 13           | 38                       | 14100                              | 20200                                          | 1.58            |

<sup>[a]</sup> Conversion was detected by <sup>1</sup>H NMR. <sup>[b]</sup>  $M_n$  and  $\bar{D}$  were determined by GPC with PEG as standard. <sup>[c]</sup>  $M_{n,\text{th}} = ([\text{AN}]_0/[\text{tralen}]_0) \times (\text{M.W. of AN}) \times \text{Conv.}$

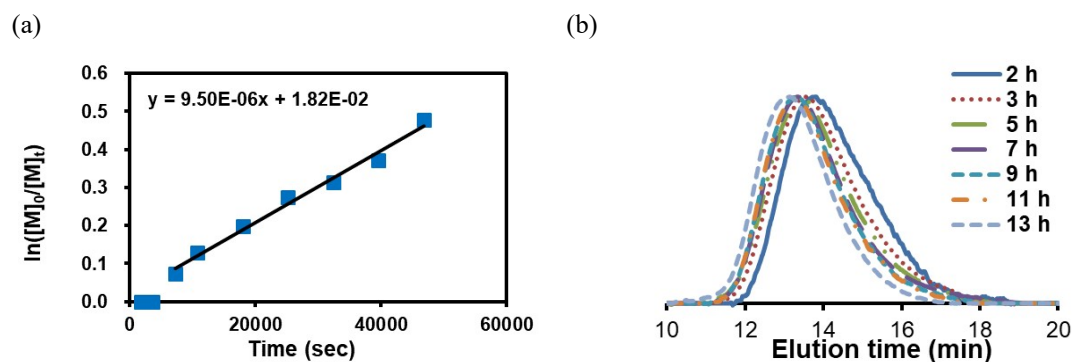

**Figure S14.** (a) First-order kinetics plots. (b) The GPC traces for the polymerization of AN mediated by tralen under the condition of  $[\text{tralen}]_0/[\text{AIBN}]_0/[\text{AN}]_0 = 1/10/1000$ ,  $[\text{AN}]_0 = 5.08 \text{ M}$  at 60 °C in DMF.

**Table S11** Polymerization of NVP mediated by tralen compound with AIBN as initiator at 60 °C in bulk under the condition of  $[\text{tralen}]_0/[\text{AIBN}]_0/[\text{NVP}]_0 = 1/10/1000$ ,  $[\text{NVP}]_0 = 9.36 \text{ M}$

| Time (mins) | Conv. <sup>[a]</sup> (%) | $M_n^{[b]}$ (g mol <sup>-1</sup> ) | $M_{n,\text{th}}^{[c]}$ (g mol <sup>-1</sup> ) | $\bar{D}^{[b]}$ |
|-------------|--------------------------|------------------------------------|------------------------------------------------|-----------------|
| 345         | 0                        | -                                  | -                                              | -               |
| 360         | 9                        | 10900                              | 10000                                          | 3.54            |
| 375         | 11                       | 14200                              | 12200                                          | 3.45            |
| 390         | 15                       | 19000                              | 16700                                          | 3.04            |
| 405         | 21                       | 20800                              | 23300                                          | 3.06            |
| 420         | 28                       | 26500                              | 31100                                          | 2.85            |

<sup>[a]</sup> Conversion was detected by <sup>1</sup>H NMR. <sup>[b]</sup>  $M_n$  and  $\bar{D}$  were determined by GPC with PEG as standard. <sup>[c]</sup>  $M_{n,\text{th}} = ([\text{NVP}]_0/[\text{tralen}]_0) \times (\text{M.W. of NVP}) \times \text{Conv.}$

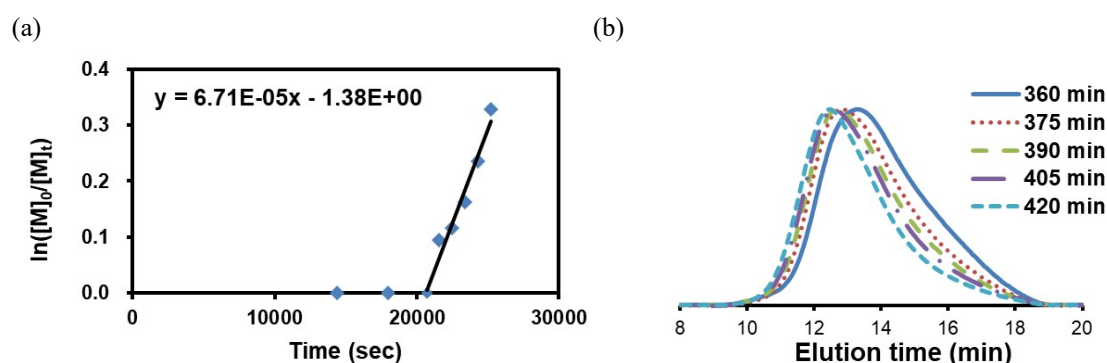

**Figure S15.** (a) First-order kinetics plots. (b) The GPC traces for the polymerization of NVP mediated by tralen under the condition of  $[\text{tralen}]_0/[\text{AIBN}]_0/[\text{NVP}]_0 = 1/10/1000$ ,  $[\text{NVP}]_0 = 9.36 \text{ M}$  at 60 °C in bulk.

**Table S12** Polymerization of NVP mediated by PVAc-tralen macroinitiator without (240-1440 min) and with AIBN (1470-1560min) as initiator at 60 °C in DMF under the condition of  $[\text{PVAc-tralen}]_0/[\text{AIBN}]_0/[\text{NVP}]_0 = 1/0/1000$  and  $1/5/2000$ .

| Time (mins) | Conv. <sup>[a]</sup> (%) | $M_n^{[b]}$ (g mol <sup>-1</sup> ) | $M_{n,\text{th}}^{[c]}$ (g mol <sup>-1</sup> ) | $\bar{D}^{[b]}$ |
|-------------|--------------------------|------------------------------------|------------------------------------------------|-----------------|
| 240         | 0                        | 17200                              | 8200                                           | 1.73            |
| 480         | 1                        | 18200                              | 18300                                          | 1.80            |
| 720         | 2                        | 21200                              | 19400                                          | 1.85            |
| 1440        | 3                        | 25500                              | 20500                                          | 2.08            |
| 1470        | 6                        | 32600                              | 30500                                          | 2.17            |
| 1500        | 14                       | 42600                              | 48300                                          | 2.09            |
| 1530        | 21                       | 49800                              | 63900                                          | 2.03            |
| 1560        | 30                       | 50800                              | 83900                                          | 2.08            |

<sup>[a]</sup> Conversion was detected by <sup>1</sup>H NMR. <sup>[b]</sup>  $M_n$  and  $\bar{D}$  were determined by GPC with PEG as standard. <sup>[c]</sup>  $M_{n,\text{th}} = ([\text{NVP}]_0/[\text{tralen}]_0) \times (\text{M.W. of NVP}) \times \text{Conv.}$

## Diffusion-ordered NMR spectroscopy (DOSY-NMR) of PVAc-*b*-PNVP block copolymer

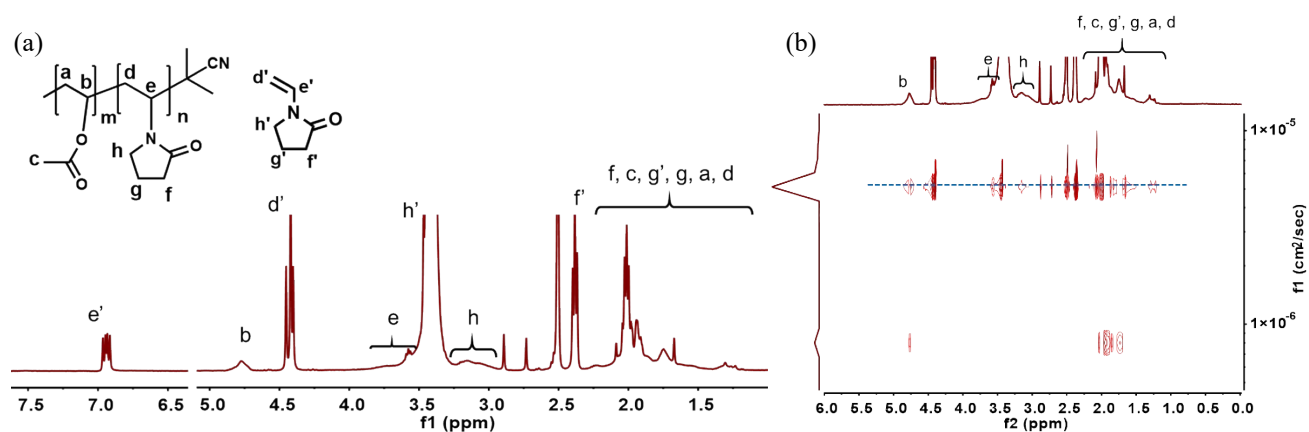

**Figure S16.** (a)  $^1\text{H}$  NMR spectrum of PVAc-*b*-PNVP block copolymer in  $\text{DMSO-}d_6$ . (b) DOSY-NMR spectrum of PVAc-*b*-PNVP block copolymer in  $\text{DMSO-}d_6$ .

## MALDI TOF spectrum

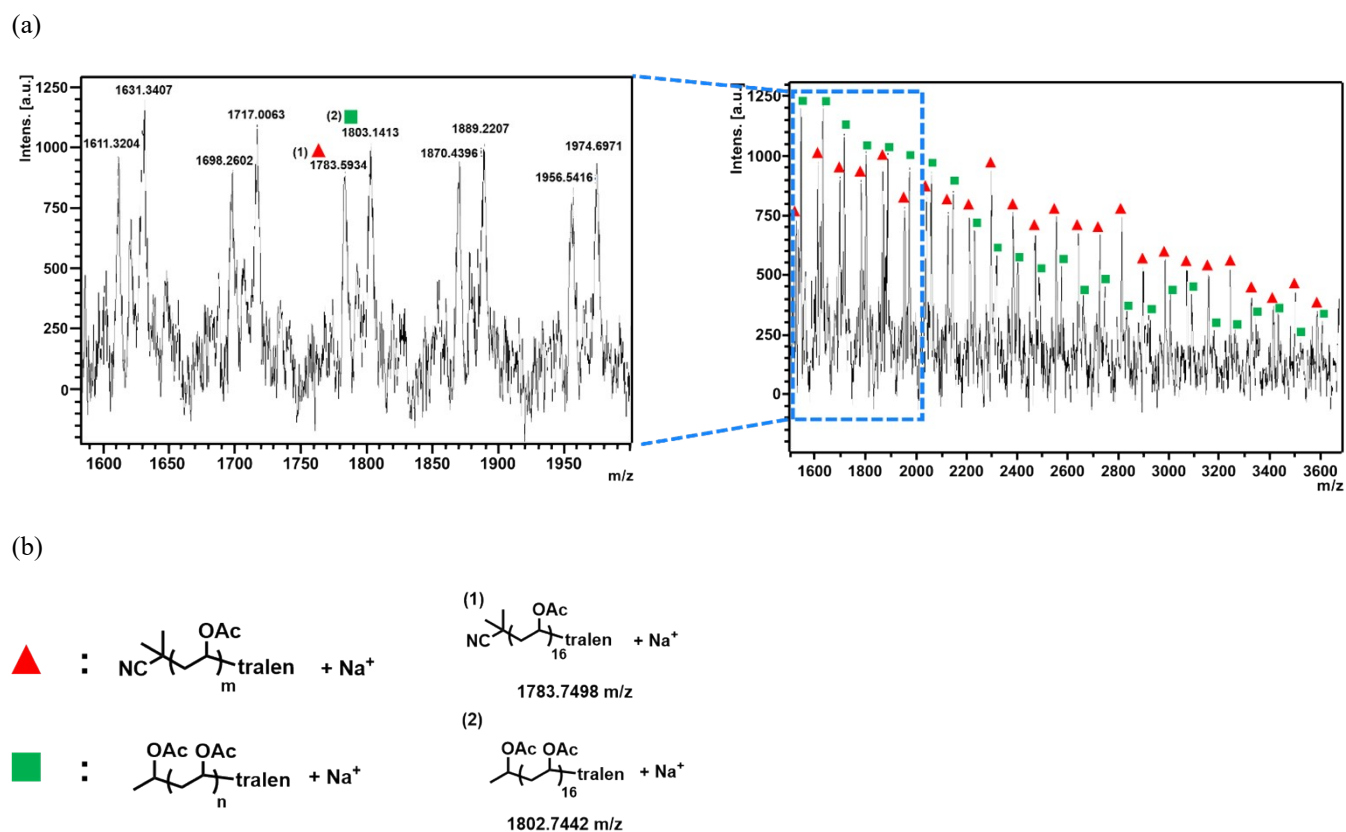

**Figure S17.** (a) MALDI-TOF spectra for the macro-initiator of PVAc-tralen obtained from the polymerization under the condition of  $[\text{tralen}]_0/[\text{AIBN}]_0/[\text{VAc}]_0 = 1/20/500$  in bulk at  $60^\circ\text{C}$ . The polymerization was stopped in 370 minutes with the conversion = 5% and  $M_n = 1900 \text{ g mol}^{-1}$ . (b) Possible molecular formula and their theoretical molecular weight.

## Model reaction for mechanism study

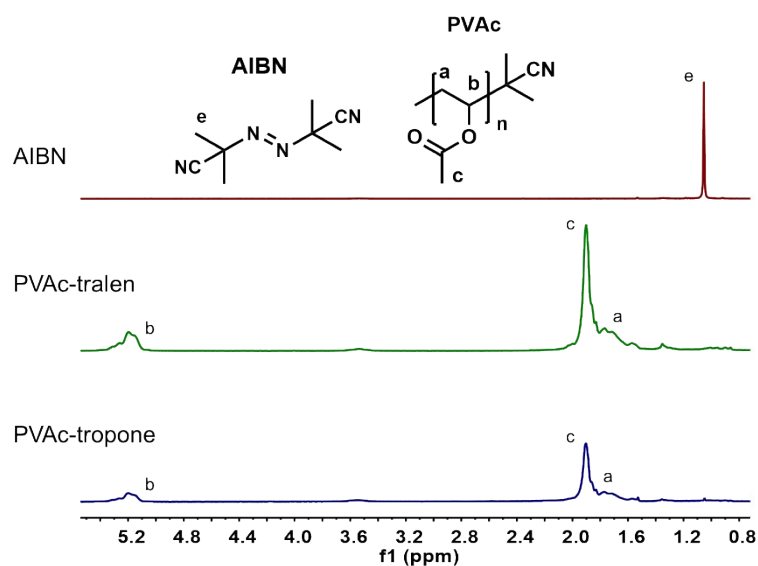

**Figure S18.** The  $^1\text{H}$  NMR spectrum of PVAc-tralen, PVAc-tropone, were purified by dry ether, and AIBN in benzene- $\text{d}_6$ .

**Table S13** Polymerization of VAc mediated by PVAc-tralen macroinitiator without (240-1440 min) and with AIBN (1450-1470min) as initiator at 60 °C in bulk under the condition of  $[\text{PVAc-tralen}]_0/[\text{AIBN}]_0/[\text{VAc}]_0 = 1/0/1000$  and  $1/20/1000$ .

| Time (mins) | Conv. <sup>[a]</sup> (%) | $M_n^{[b]}$ (g mol <sup>-1</sup> ) | $M_{n,th}^{[c]}$ (g mol <sup>-1</sup> ) | $\bar{D}^{[b]}$ |
|-------------|--------------------------|------------------------------------|-----------------------------------------|-----------------|
| 240         | 2                        | 8700                               | 9900                                    | 2.67            |
| 480         | 4                        | 9400                               | 11600                                   | 2.95            |
| 720         | 6                        | 11100                              | 13400                                   | 2.83            |
| 1440        | 8                        | 12100                              | 15100                                   | 3.26            |
| 1450        | 10                       | 12200                              | 16800                                   | 3.35            |
| 1460        | 19                       | 23500                              | 24600                                   | 2.65            |
| 1470        | 29                       | 29500                              | 33200                                   | 2.81            |

<sup>[a]</sup> Conversion was detected by  $^1\text{H}$  NMR. <sup>[b]</sup>  $M_n$  and  $\bar{D}$  were determined by GPC with polystyrene as standard. <sup>[c]</sup>  $M_{n,th} = ([\text{VAc}]_0/[\text{tralen}]_0) \times (\text{M.W. of VAc}) \times \text{Conv.}$



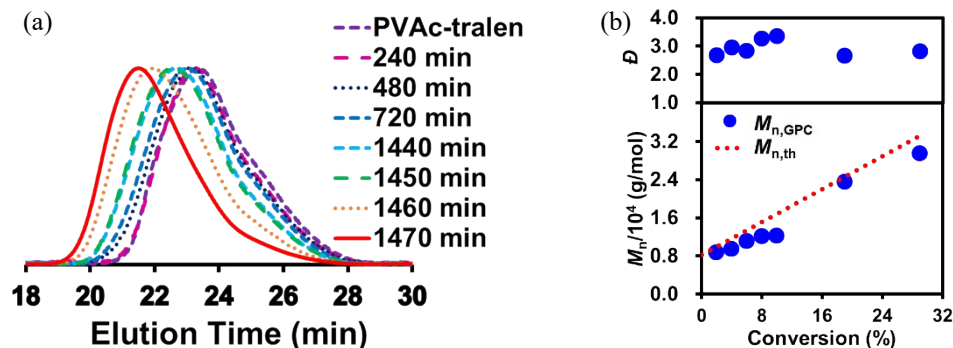

**Figure S19.** (a) The GPC traces of VAc polymerization mediated by PVAc-tralen under the condition of  $[\text{PVAc-tralen}]_0/[\text{AIBN}]_0/[\text{VAc}]_0 = 1/0/1000$  and  $[\text{PVAc-tralen}]_0/[\text{AIBN}]_0/[\text{VAc}]_0 = 1/20/1000$  in bulk at 60 °C. The macroinitiator PVAc-tralen was synthesized under the condition of  $[\text{tralen}]_0/[\text{AIBN}]_0/[\text{VAc}]_0 = 1/20/500$  at 60 °C in bulk for 390 minutes with conversion equal to 27% with  $M_n$  equal to 8,200 g/mol and  $\bar{D}$  equal to 2.71. (b) the plots of  $M_n$  and  $\bar{D}$  versus conversion under the condition of  $[\text{PVAc-tralen}]_0/[\text{AIBN}]_0/[\text{VAc}]_0 = 1/0/1000$  and  $[\text{PVAc-tralen}]_0/[\text{AIBN}]_0/[\text{VAc}]_0 = 1/20/1000$ .

**Table S14** Polymerization of VAc mediated by PVAc-tropone macroinitiator at 60 °C in bulk under the condition of  $[\text{PVAc-tropone}]_0/[\text{AIBN}]_0/[\text{VAc}]_0 = 1/0/2000$ .

| Time (mins) | Conv. <sup>[a]</sup> (%) | $M_n^{[b]}$ (g mol <sup>-1</sup> ) | $M_{n,\text{th}}^{[c]}$ (g mol <sup>-1</sup> ) | $\bar{D}^{[b]}$ |
|-------------|--------------------------|------------------------------------|------------------------------------------------|-----------------|
| 120         | 2                        | 36300                              | 6400                                           | 1.46            |
| 180         | 4                        | 51800                              | 9900                                           | 1.44            |
| 240         | 7                        | 66300                              | 15100                                          | 1.75            |
| 360         | 19                       | 97600                              | 35700                                          | 1.99            |
| 420         | 29                       | 100900                             | 52900                                          | 2.30            |

<sup>[a]</sup> Conversion was detected by <sup>1</sup>H NMR. <sup>[b]</sup>  $M_n$  and  $\bar{D}$  were determined by GPC with polystyrene as standard. <sup>[c]</sup>  $M_{n,\text{th}} = ([\text{VAc}]_0/[\text{tropone}]_0) \times (\text{M.W. of VAc}) \times \text{Conv.}$  Due to the bimodal GPC traces, the  $M_n$  and  $\bar{D}$  were the values for the single peak at high  $M_n$  region.

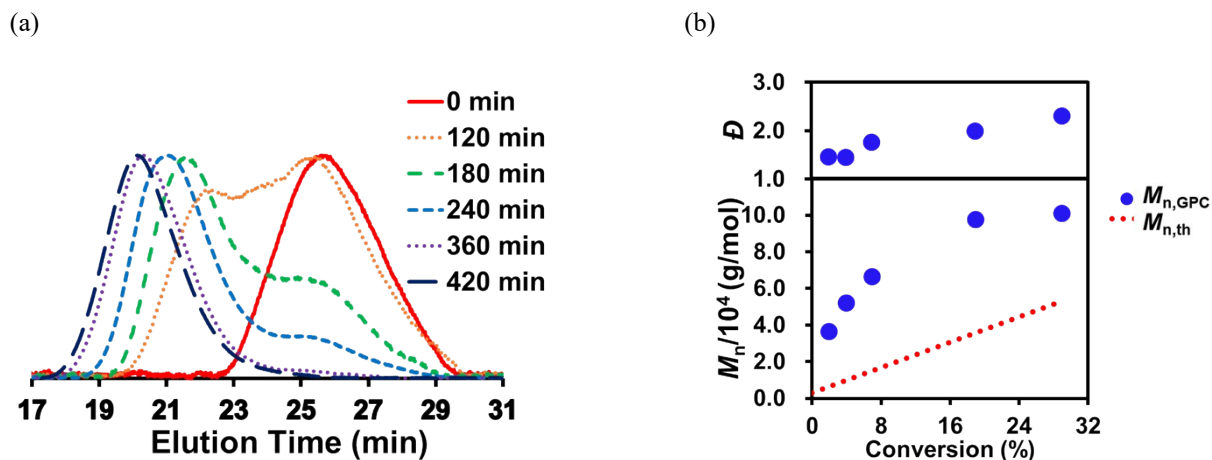

**Figure S20.** The GPC traces of VAc polymerization mediated by PVAc-tropone under the condition of (a)  $[PVAc-tropone]_0/[AIBN]_0/[VAc]_0 = 1/0/2000$  and (b) The plots of  $M_n$  and  $\bar{D}$  versus conversion under the condition of  $[PVAc-tropone]_0/[AIBN]_0/[VAc]_0 = 1/0/2000$ . The macroinitiator PVAc-tropone was synthesized under the condition of  $[tropone]_0/[AIBN]_0/[VAc]_0 = 1/20/300$  at 60 °C in bulk for 360 minutes with conversion equal to 2% with  $M_n$  equal to 3300 g/mol and  $\bar{D}$  equal to 1.62. Due to the bimodal GPC traces, the  $M_n$  and  $\bar{D}$  were the values for the single peak at high  $M_n$  region.

## References

1. Chen, S.-J.; Tang, S.-C.; Zhang, P.; Chen, C.; Peng, C.-H., Aluminum Tralen Complex Meditated Reversible-Deactivation Radical Polymerization of Vinyl Acetate. *ACS Macro Lett.* **2020**, 9 (10), 1423–1428.
2. Kamachi, M.; Yamada, B. Propagation and Termination Constants in Free Radical Polymerization. In *Polymer Handbook*, 4th ed.; Brandrup, J., Immergut, E. H., Grulke, E. A., Eds.; Wiley-Interscience: New Jersey, 2003; Vol. 1, pp 77–96.
3. Barner-Kowollik, C.; Beuermann, S.; Buback, M.; Hutchinson, R. A.; Junkers, T.; Kattner, H.; Manders, B.; Nikitin, A. N.; Russell, G. T.; van Herk, A. M., Critically Evaluated Rate Coefficients in Radical Polymerization – 8. Propagation Rate Coefficients for Vinyl Acetate in Bulk. *Macromol. Chem. Phys.* **2017**, 218 (1), 1600357.
